# Supplementary material for: Versatile chewed gum composites with liquid metal for strain sensing, electromagnetic interference shielding and flexible electronics
Source: Royal Society of Chemistry journal article supplement (doi:10.1039/d3tc02067c), 2023-01-01
Supplement: d3tc02067c1.pdf [file d3tc02067c1.pdf]

1

*Supporting Information*

2 **Versatile chewed gum with liquid metal for strain sensors,**  
3 **electromagnetic interference shielding and flexible electronics**

4

5 *Hongwei Yu, Lei Yu, Xiulei Qi, Jing Cui, Ke Wu, Yide Liu, Long Chen, Xiankai Li \**

6

7 State Key Laboratory of Bio-Fibers and Eco-Textiles, Collaborative Innovation Center  
8 for Marine Biomass Fibers, Materials and Textiles of Shandong Province, College of  
9 Materials Science and Engineering, Institute of Marine Biobased Materials, Qingdao  
10 University, Ningxia Road 308, Qingdao, 266071, P.R.

11

12 \*Corresponding authors: Xiankai Li (likai235@163.com)

13

14

15

16

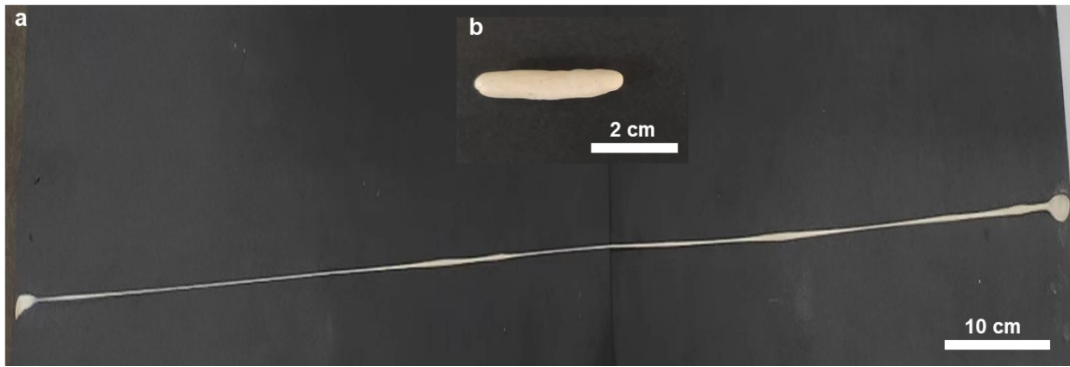

1

2 **Fig. S1** (a & b) Photographs of chewed gum (a) and its stretched state (b).

3

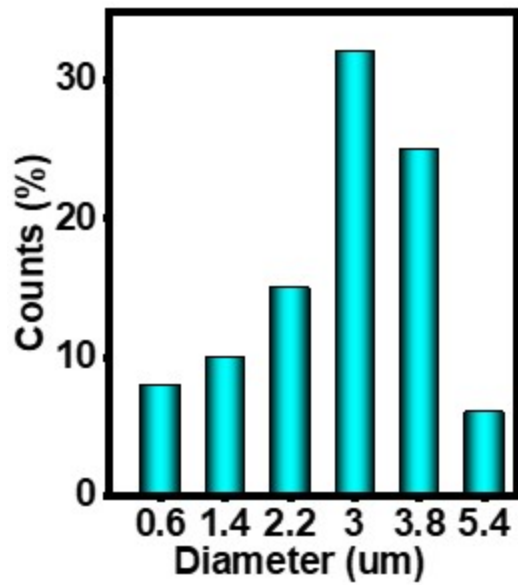

4

5 **Fig. S2** Diameter histogram of LM droplets in chewed gum.

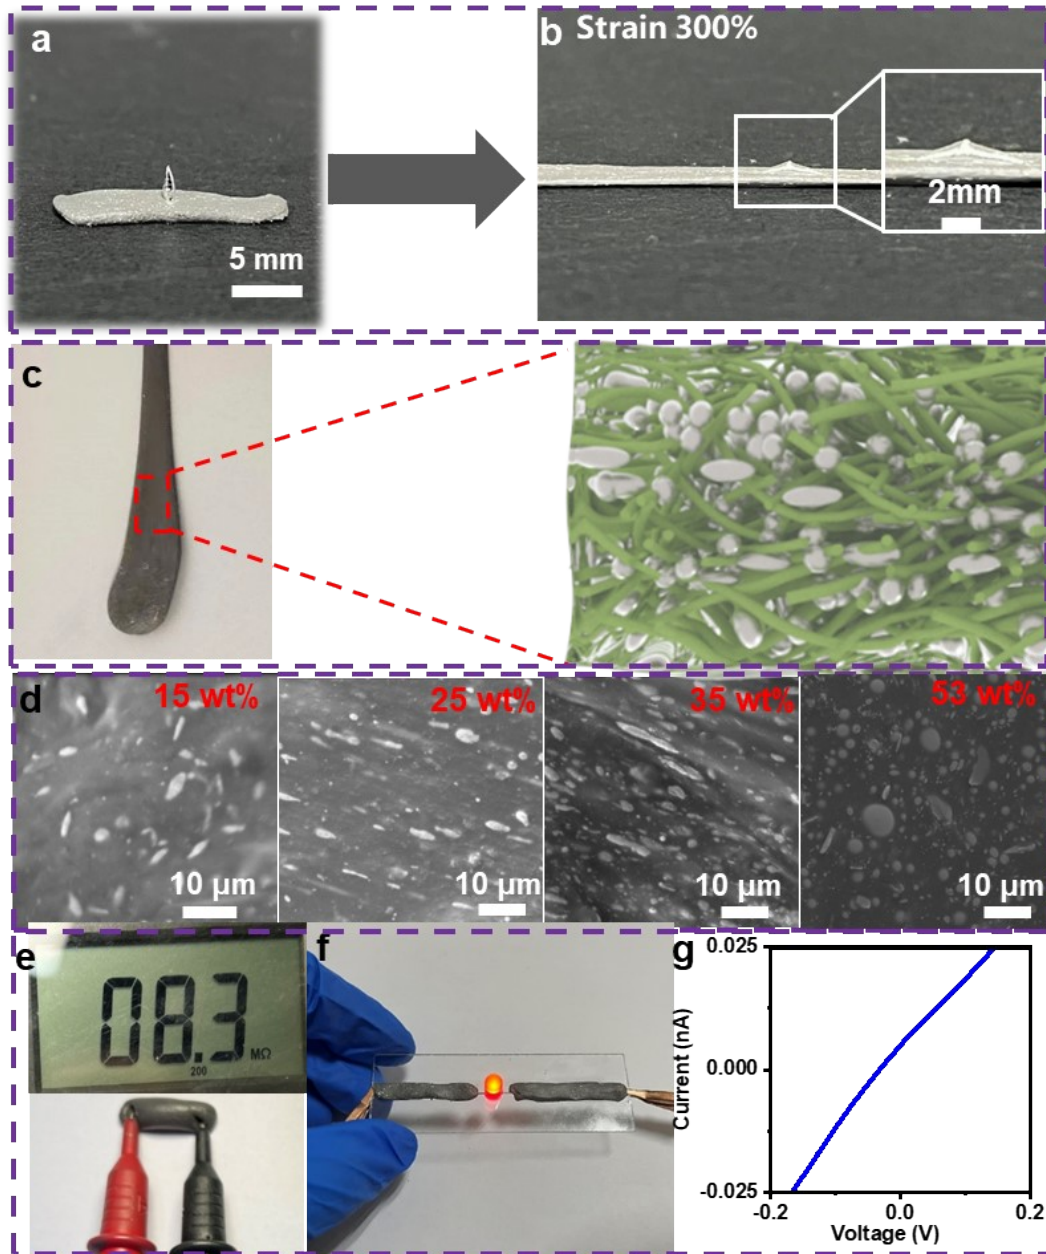

1

2 **Fig. S3** (a & b) LM droplets on chewed gum (a) and its stretched state at strain of 300%

3 (b). (c) Chewed gum filled with LM micro/nano droplets and its schematic diagram. (d)

4 SEM images of chewed gum filled with different contents of LM micro/nano droplets.

5 (e–g) Resistance (e), conductivity test (f) and current-voltage curve (g) of chewed gum

6 filled with LM micro/nano droplets.

7

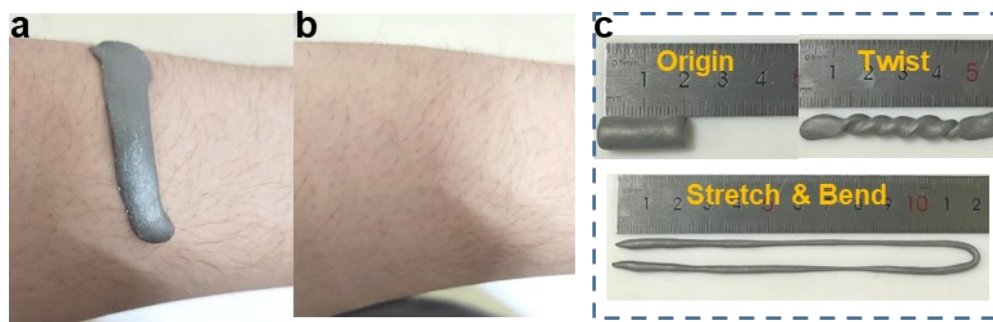

1

2 **Fig. S4** (a & b) Optical image of chewed gum filled with LM droplets before (a) and  
 3 after (b) adhering to skin test. (c) Twisting, bending and stretching test of chewed gum  
 4 filled with LM droplets.

5

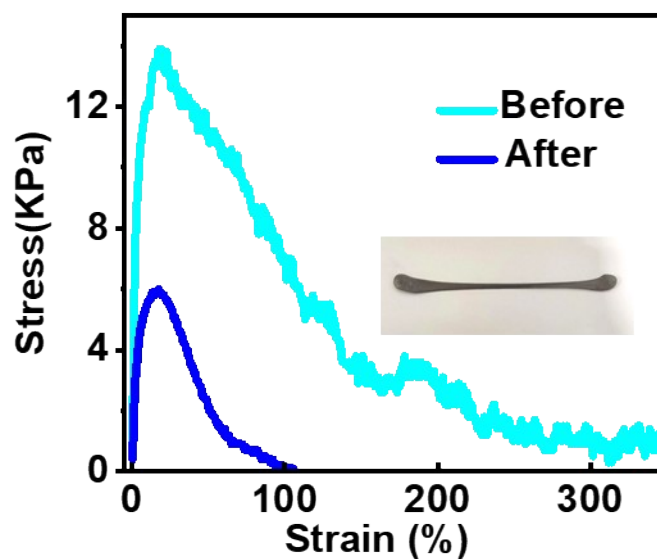

6

7 **Fig. S5** Mechanical performance chewed gum before and after healing.

8

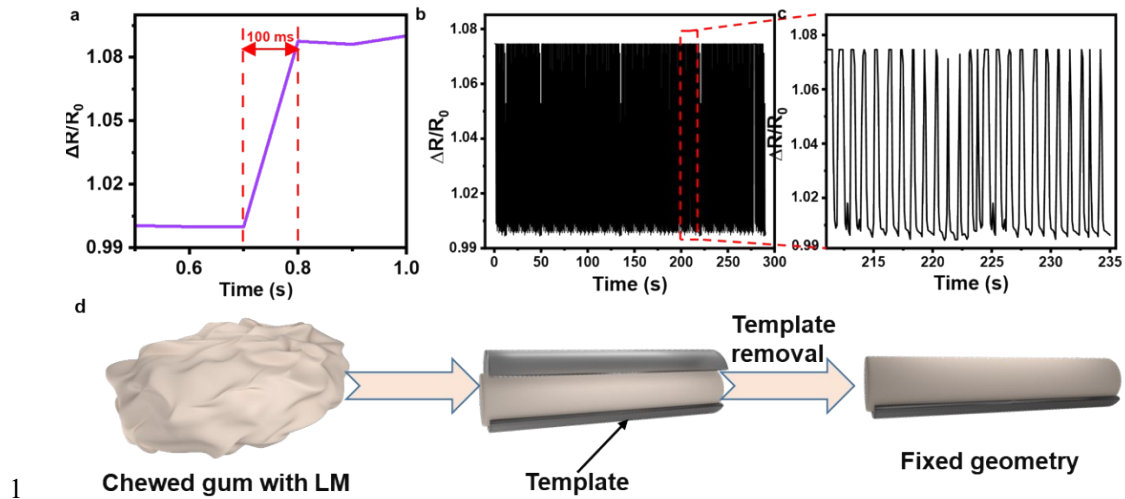

1 **Fig. S6** (a) Response time of chewed gum as strain sensor. (b) The sensing performance  
 2 of chewed gum based sensor when fixed on the finger under repeated bending (angle  
 3 of 90°)-release for 500 cycles. (c) The relative resistance change curves extracted from  
 4 the red part in (b). (d) Preparation process of chewed gum for electrical conductivity  
 5 measurement.  
 6

7

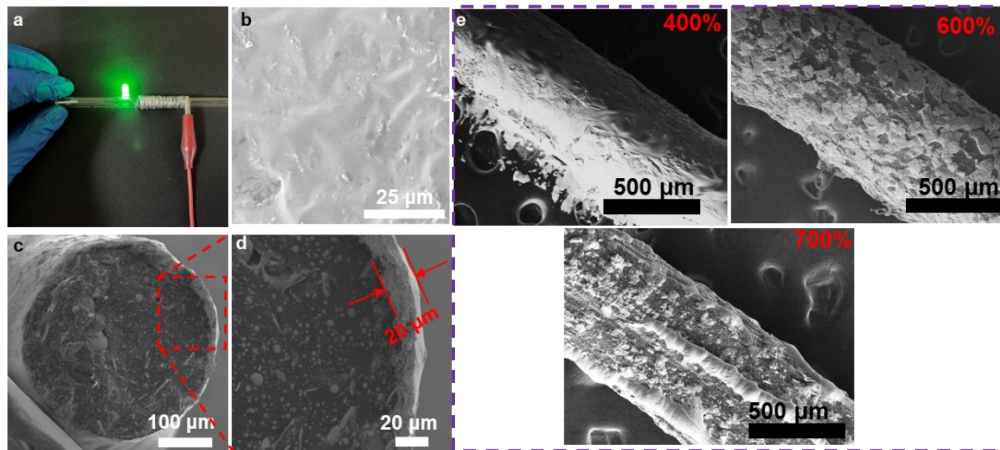

8

9 **Fig. S7** (a) Conductive gum wrapped with LM as an electrode. (b–d) SEM image of  
 10 surface (b) and cross section (c & d) of conductive chewed gum. (e) SEM images of  
 11 surface morphology for liquid metal layer wrapped on the chewed gum during  
 12 stretching process, which corresponding to strain of 400%, 600% and 700%.

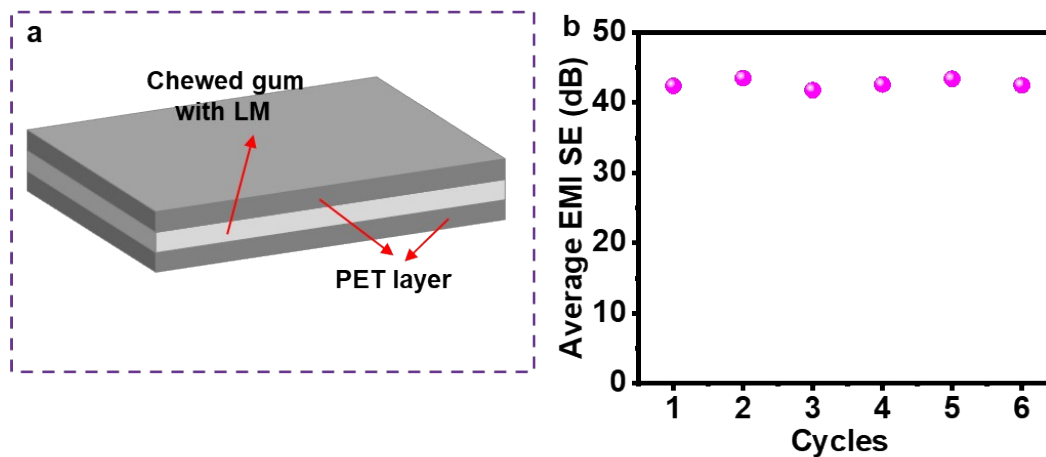

1

2 **Fig. S8** (a) schematic diagram of chewed gum with liquid metal for EMI shielding

3 measurement. (b) Average EMI SE value of chewed gum wrapped with liquid metal

4 for different cycles.

5

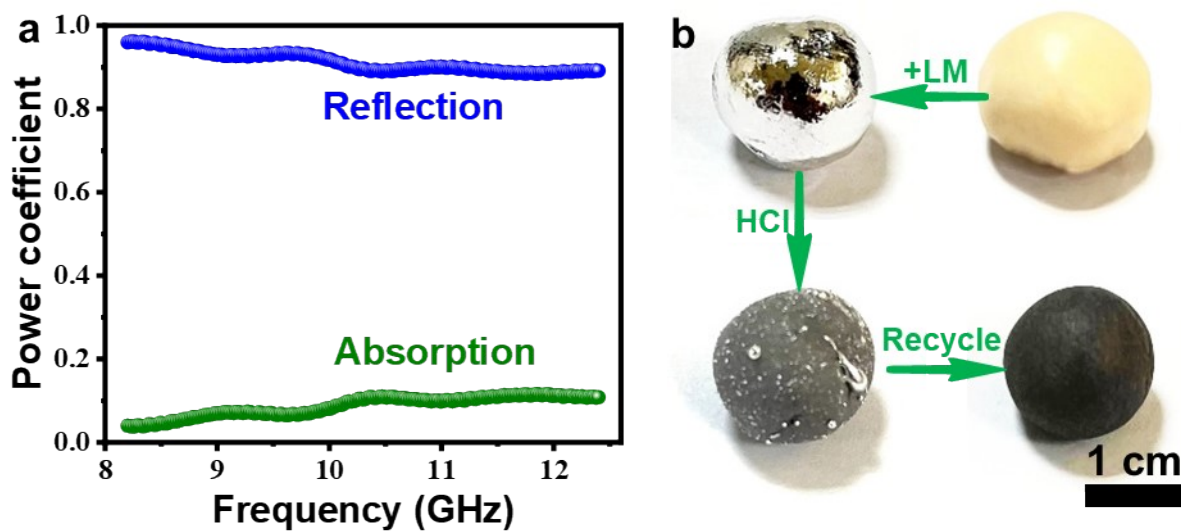

6

7

8 **Fig. S9** (a) Reflection and absorption coefficient of chewed gum wrapped with liquid

9 metal in frequency range 8.2-12.4 GHz. (b) Recycled test of conductive chewed gum

10 wrapped with bulk LM in 1 M HCl solution.
